# Supplementary material for: Thin p-type NiO nanosheet modified peanut-shaped monoclinic BiVO4 for enhanced charge separation and photocatalytic activities
Source: Royal Society of Chemistry journal article supplement (doi:10.1039/d2cy00892k), 2022-01-01
Supplement: d2cy00892k7.pdf [file d2cy00892k7.pdf]

# Supplementary Information

## **Thin p-type NiO nanosheet modified peanut-shaped monoclinic BiVO<sub>4</sub> for enhanced charge separation and photocatalytic activities**

Yaru Peng <sup>a</sup>, Junhao Cai <sup>b</sup>, Yuxin Shi <sup>b</sup>, Haoxiang Jiang <sup>c\*</sup> and Guoqiang Li <sup>a, b, d\*</sup>

a. Key Laboratory of Photovoltaic Materials of Henan Province, School of Physics and Electronics, Henan University, Kaifeng 475004, PR China

b. National Demonstration Center for Experimental Physics and Electronics Education, School of Physics and Electronics, Henan University, Kaifeng 475004, PR China

c. Guangdong Provincial Key Laboratory of Quantum Engineering and Quantum Materials, School of Physics and Telecommunication Engineering, South China Normal University, Guangzhou, 510006, China

d. International Joint Research Laboratory of New Energy Materials and Devices of Henan Province, School of Physics and Electronics, Henan University, Kaifeng, 475004, PR China

\*Corresponding authors. E-mail addresses: haoxiang.jiang@m.scnu.edu.cn, gqli1980@henu.edu.cn

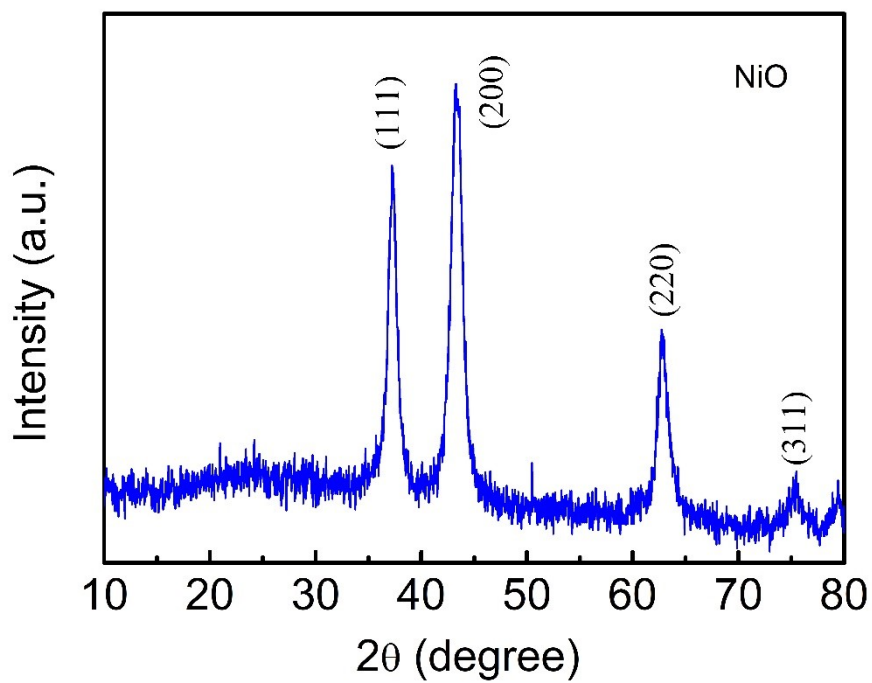

Fig. S1 XRD pattern of NiO.

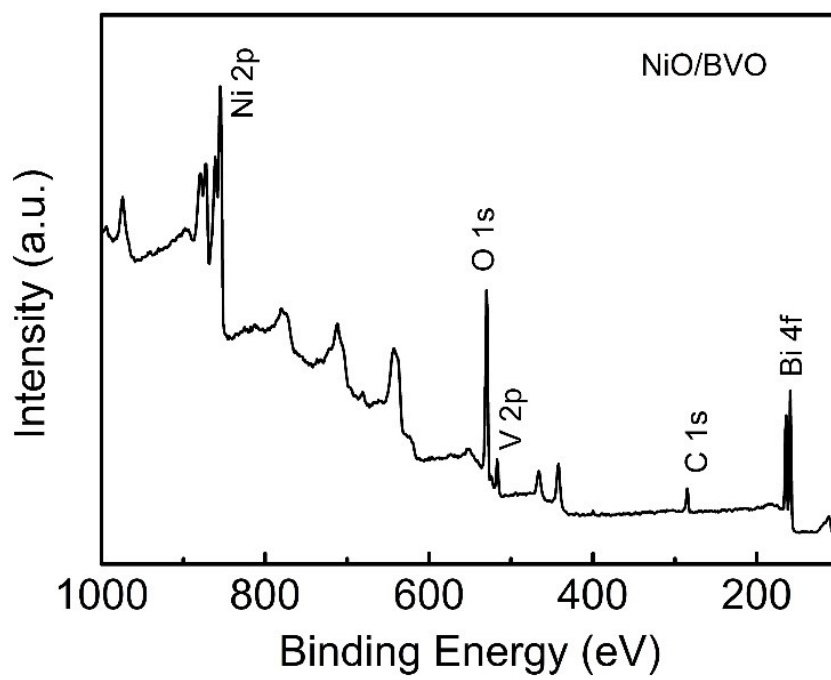

Fig. S2 XPS survey spectrum of NiO/BVO.

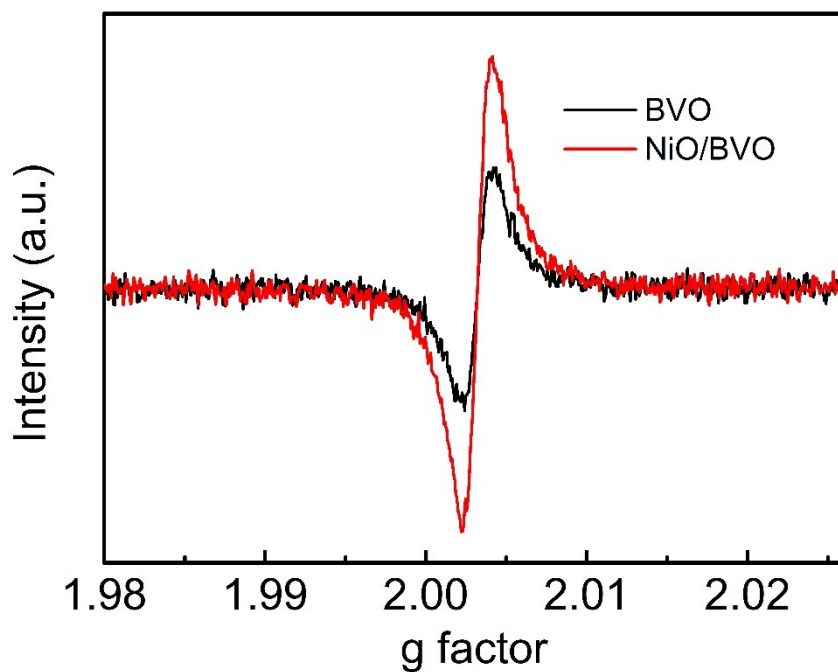

Fig. S3 Low-temperature EPR spectra of BVO and NiO/BVO.

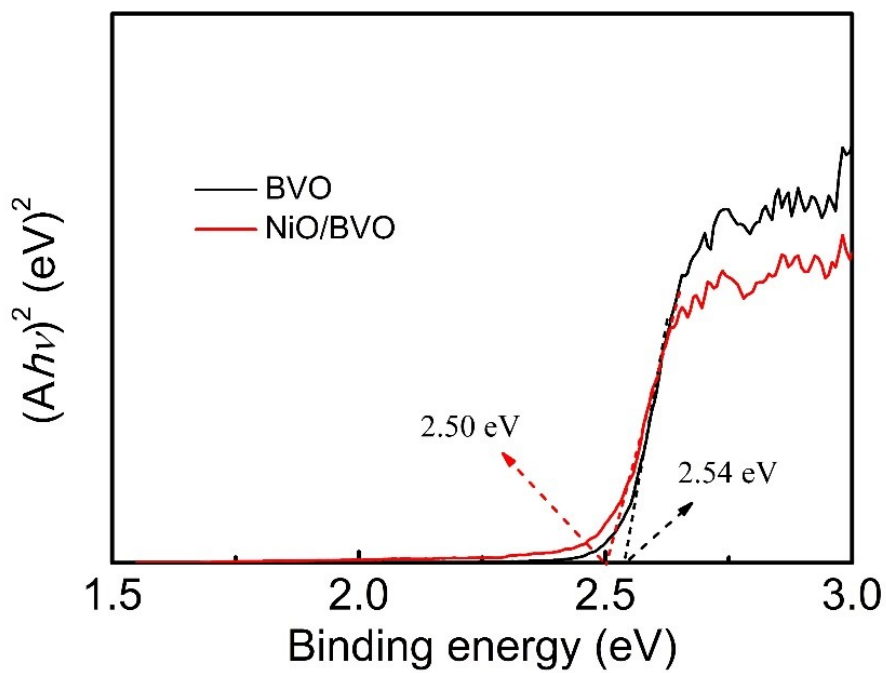

Fig. S4 Optical band gap plots of BVO and NiO/BVO.

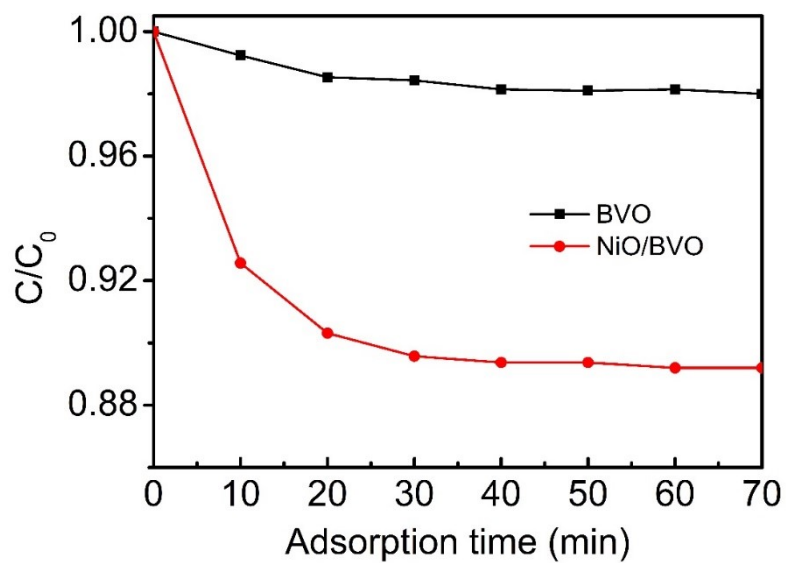

Fig. S5 Adsorption equilibrium curve of BVO and NiO/BVO.

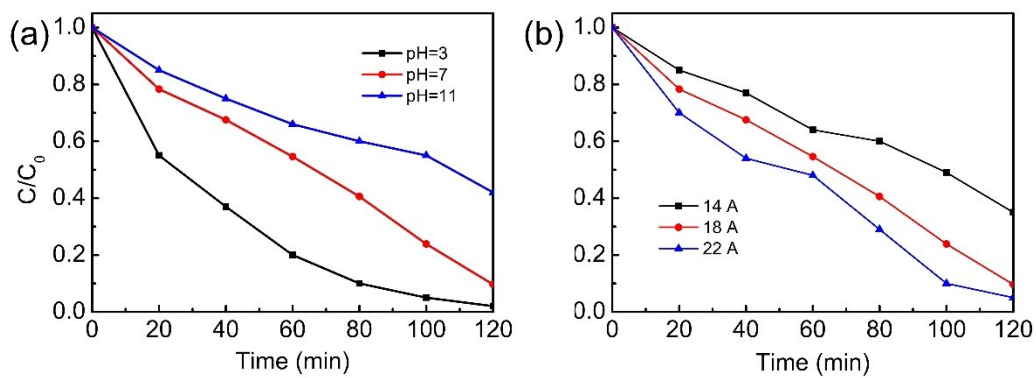

Fig. S6 Degradation of RhB under different pH values (a) and light intensities (b).
