# Supplementary figures and images for: Thin p-type NiO nanosheet modified peanut-shaped monoclinic BiVO4 for enhanced charge separation and photocatalytic activities
Source: Royal Society of Chemistry journal article supplement (doi:10.1039/d2cy00892k), 2022-01-01

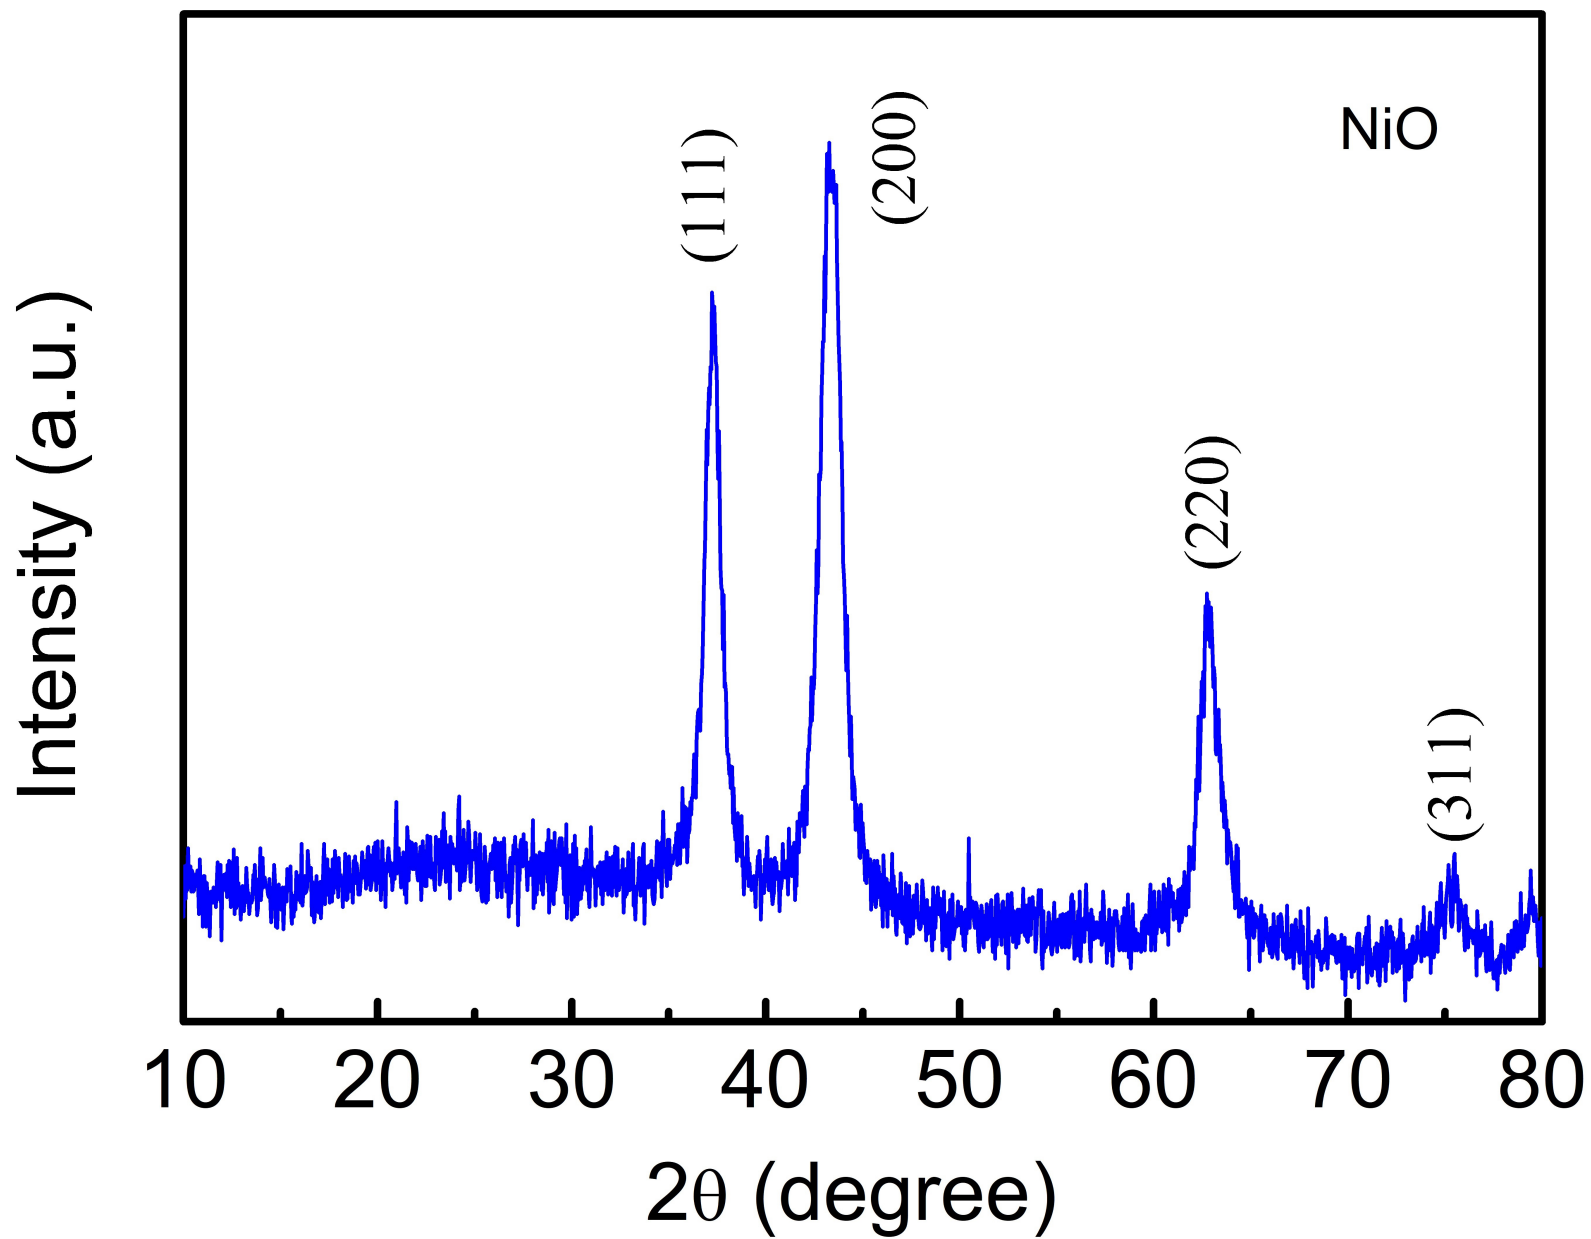

Supplement: d2cy00892k1.pdf [file d2cy00892k1.pdf]

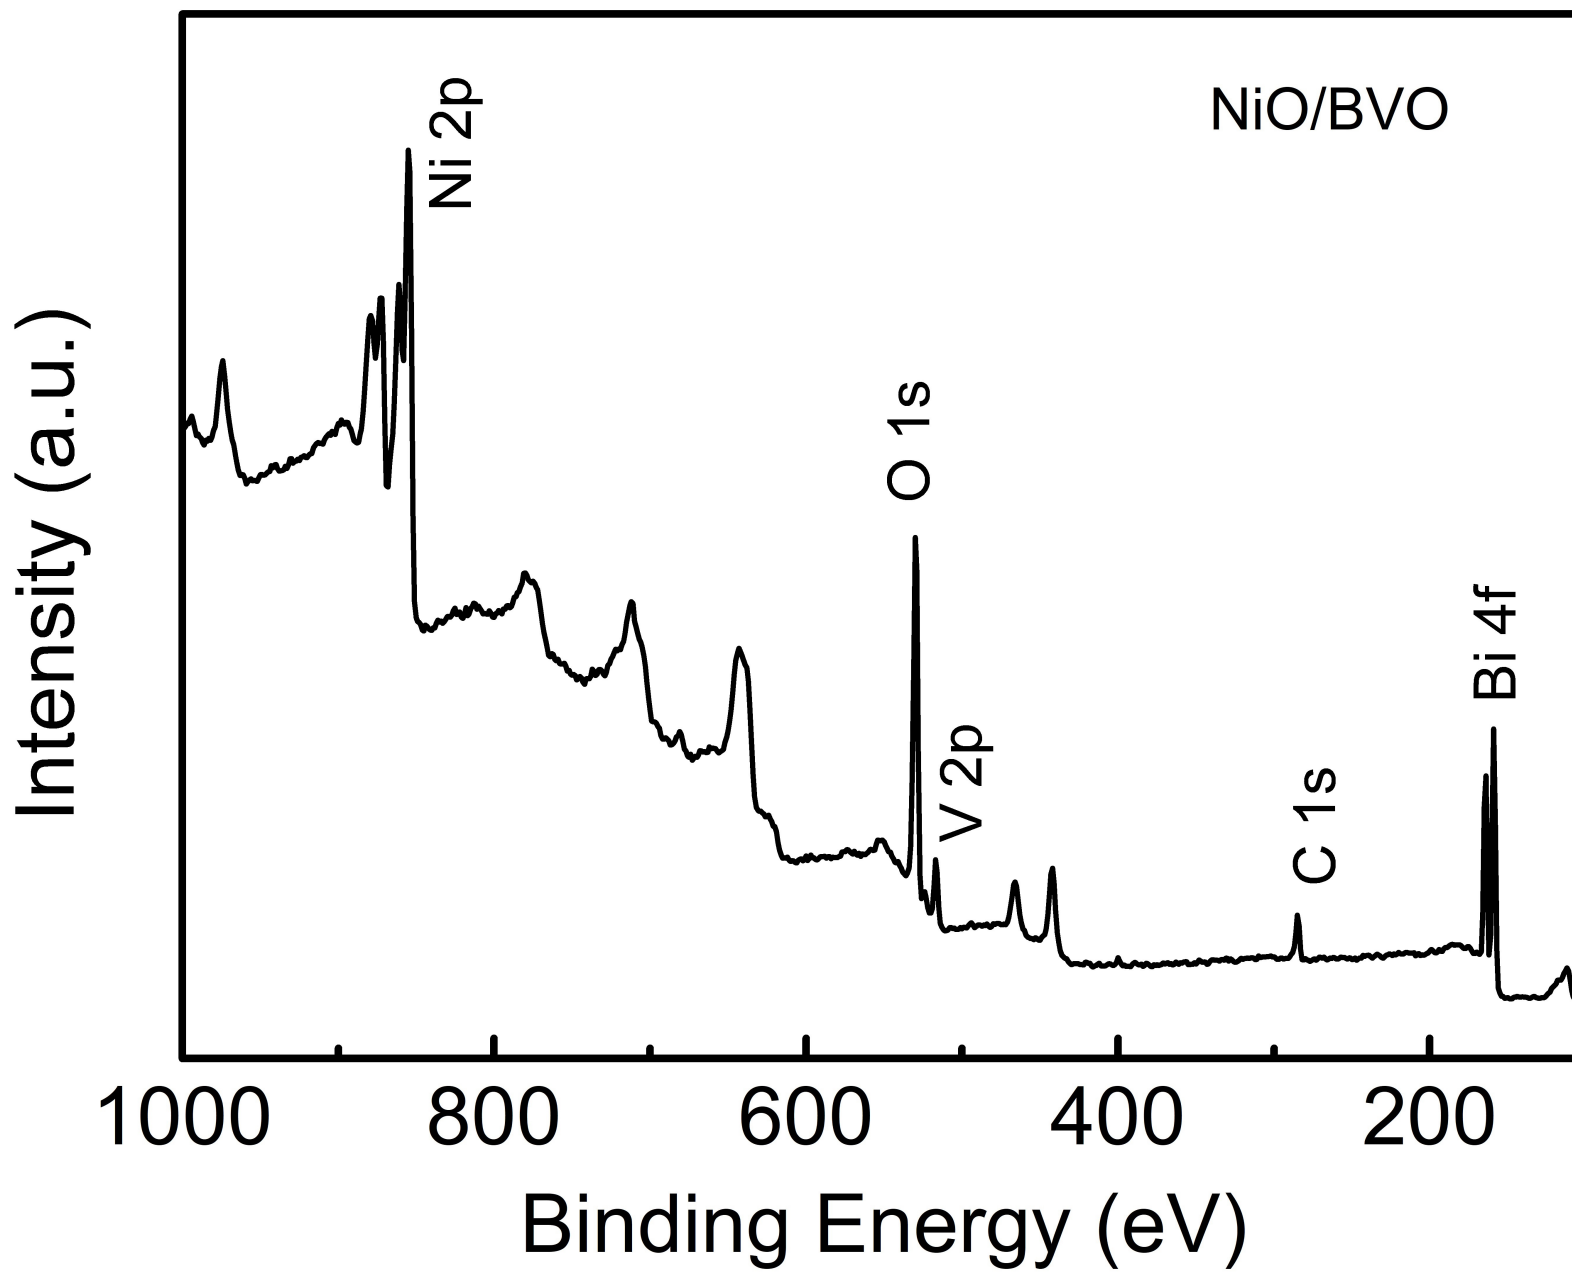

Supplement: d2cy00892k2.pdf [file d2cy00892k2.pdf]

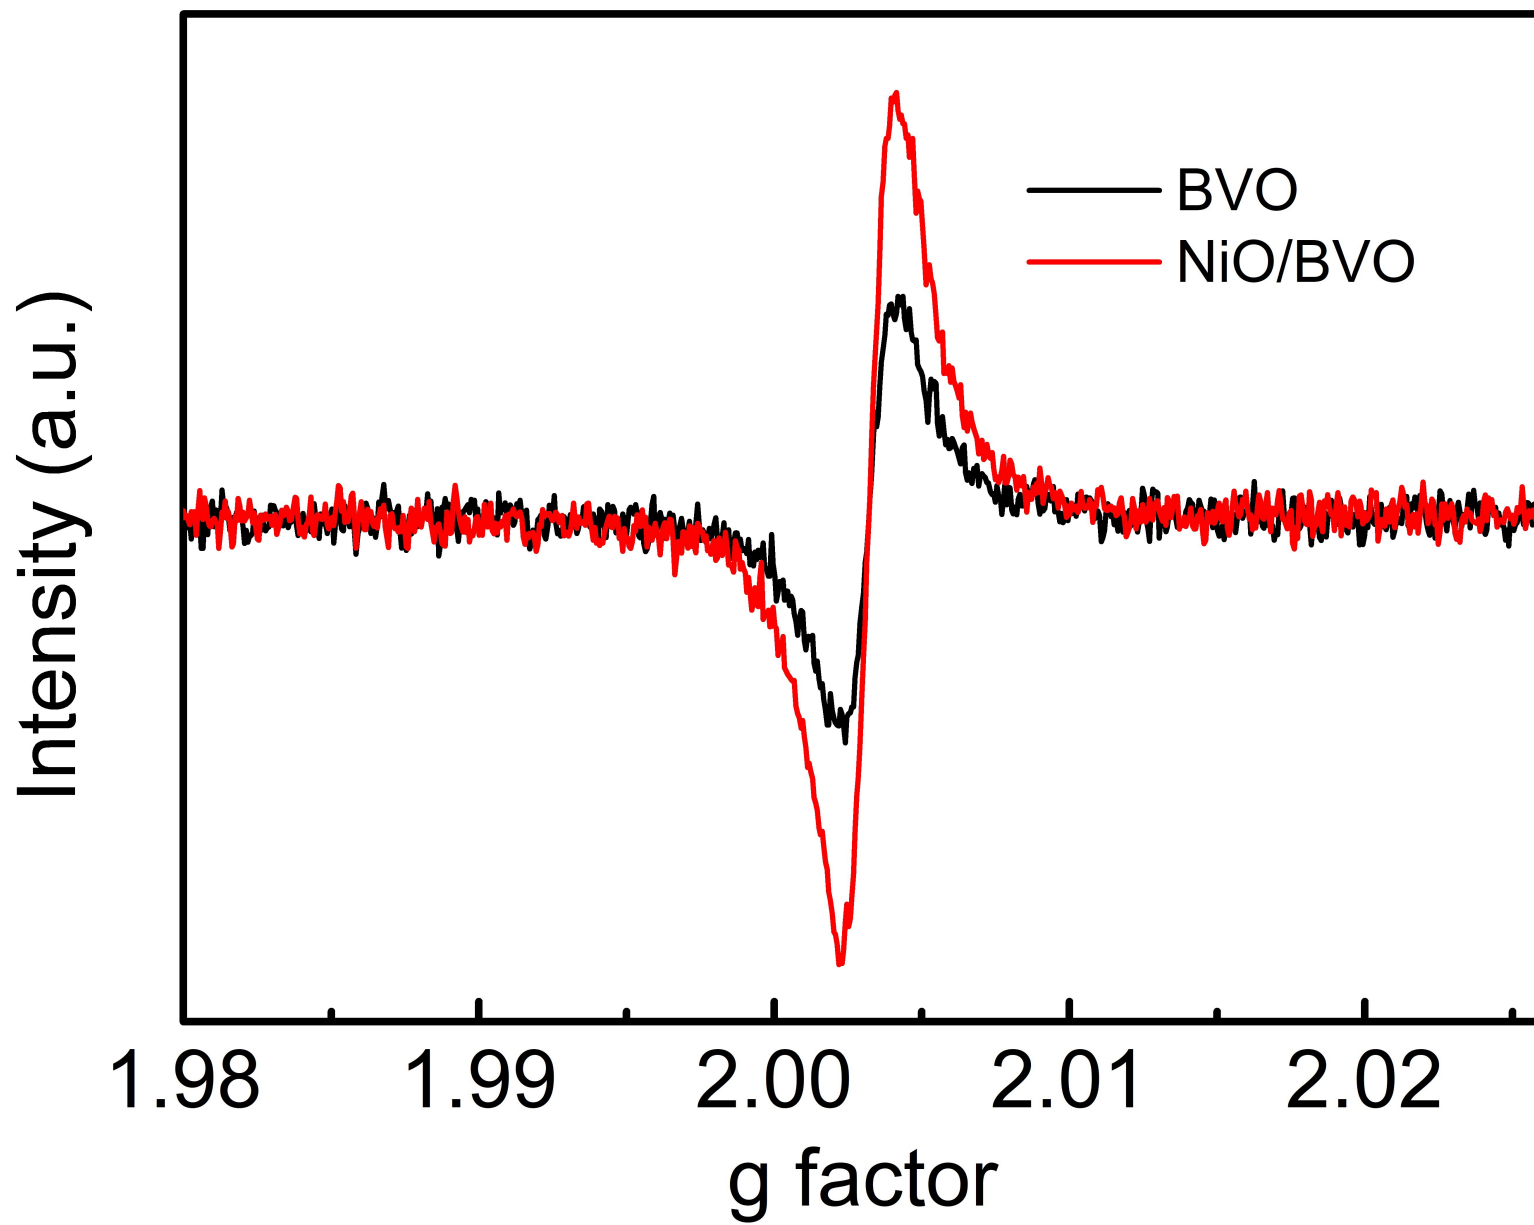

Supplement: d2cy00892k3.pdf [file d2cy00892k3.pdf]

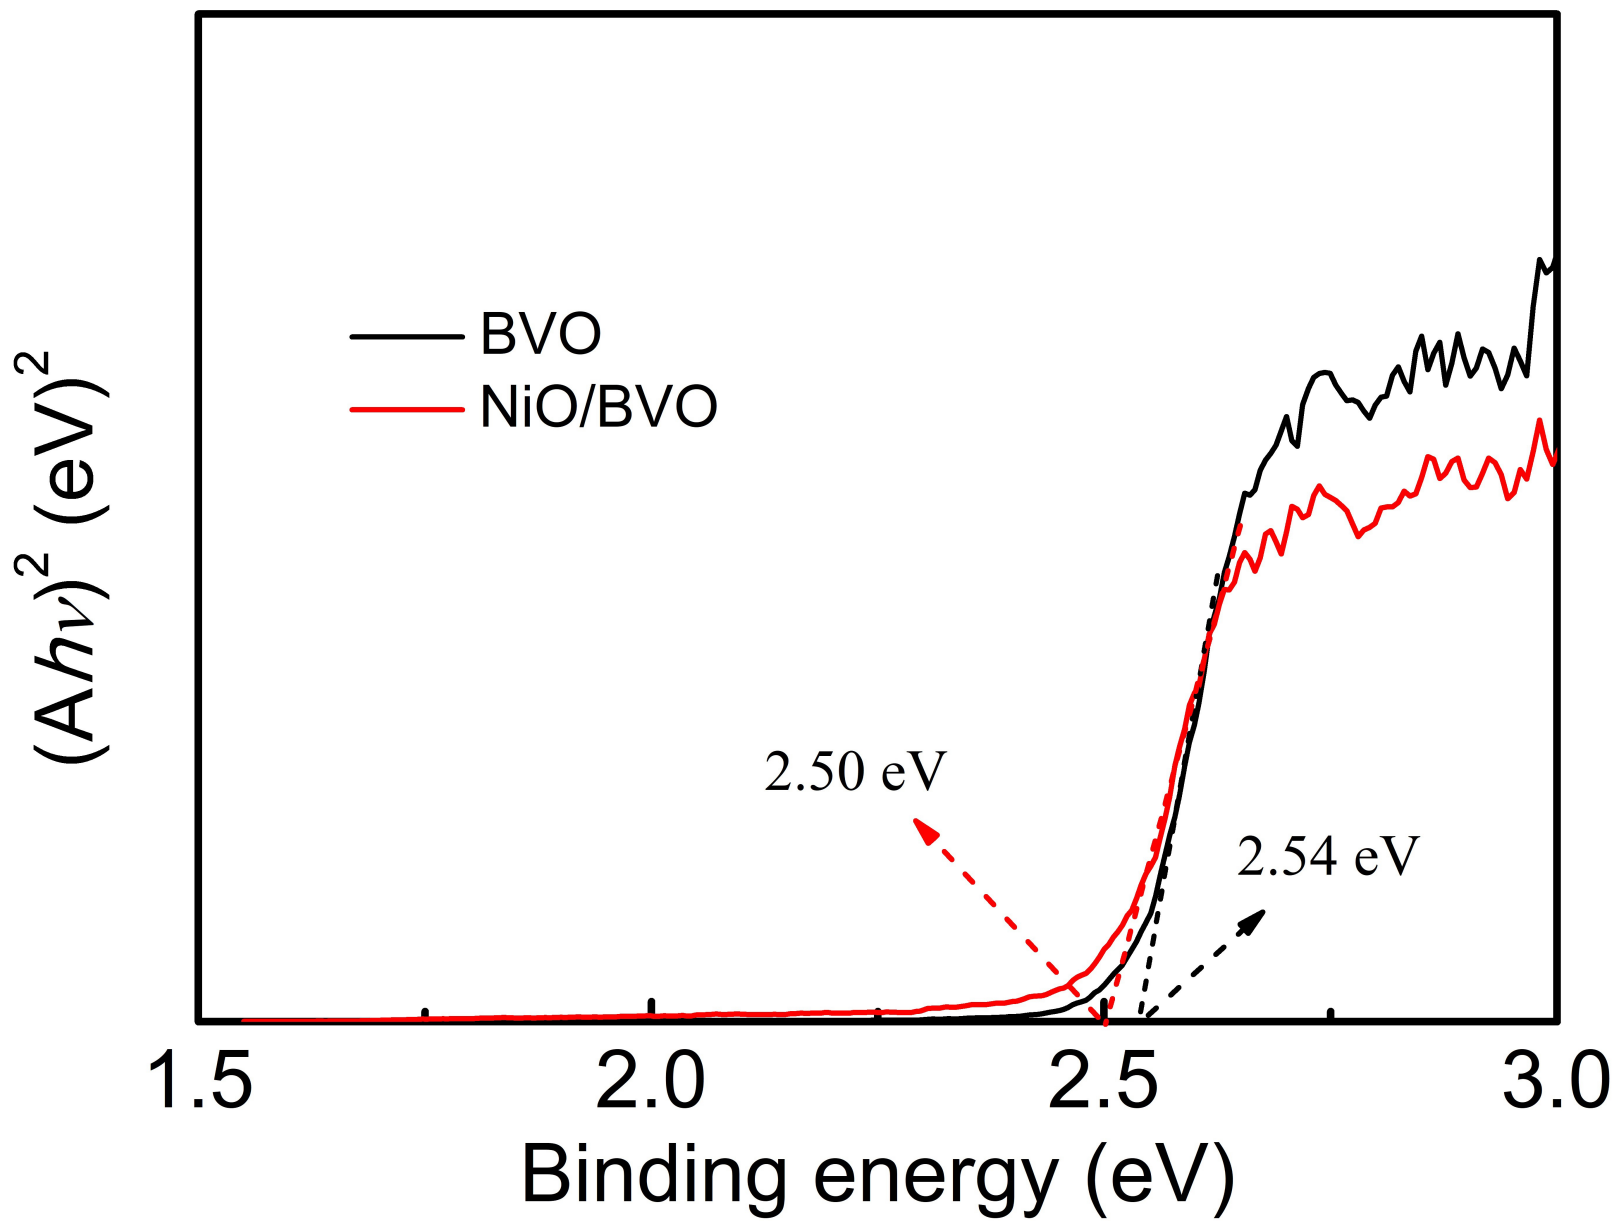

Supplement: d2cy00892k4.pdf [file d2cy00892k4.pdf]

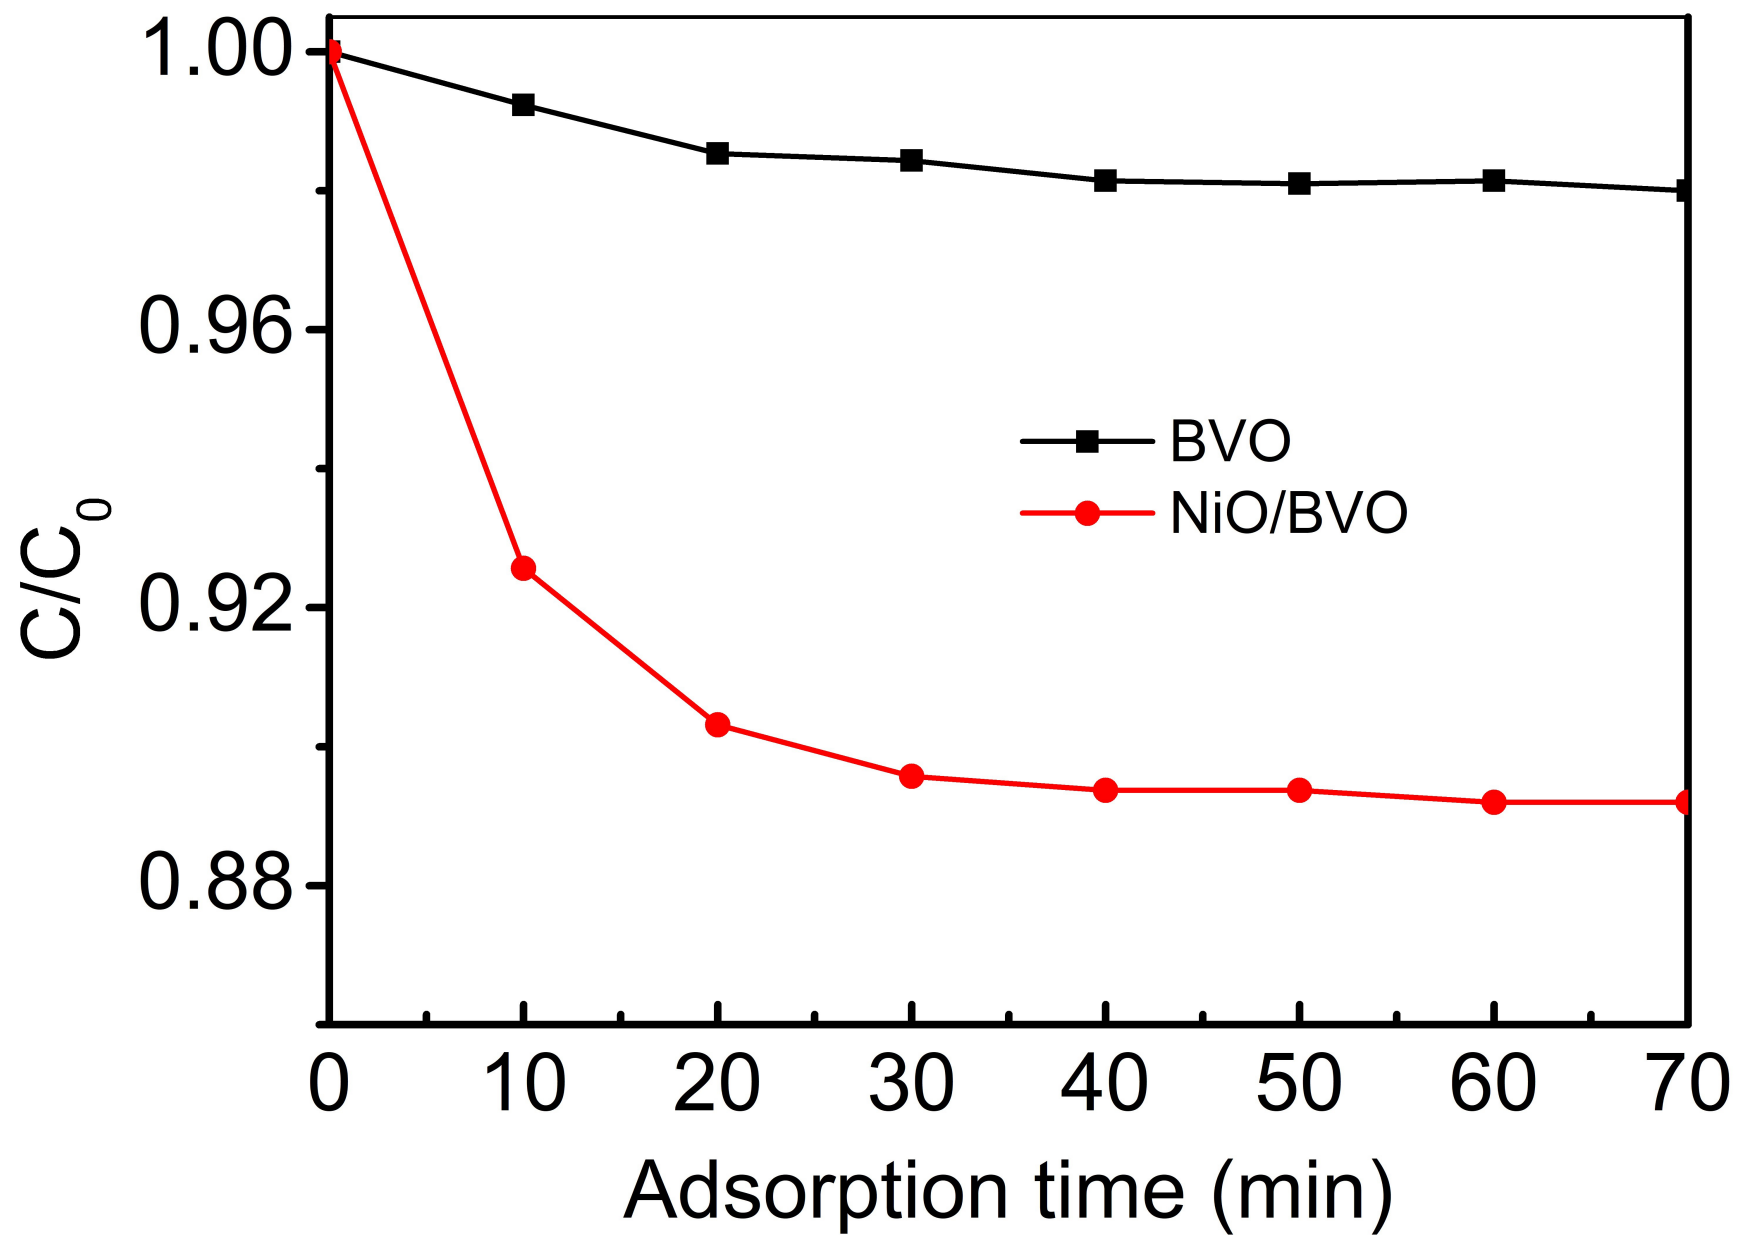

Supplement: d2cy00892k5.pdf [file d2cy00892k5.pdf]

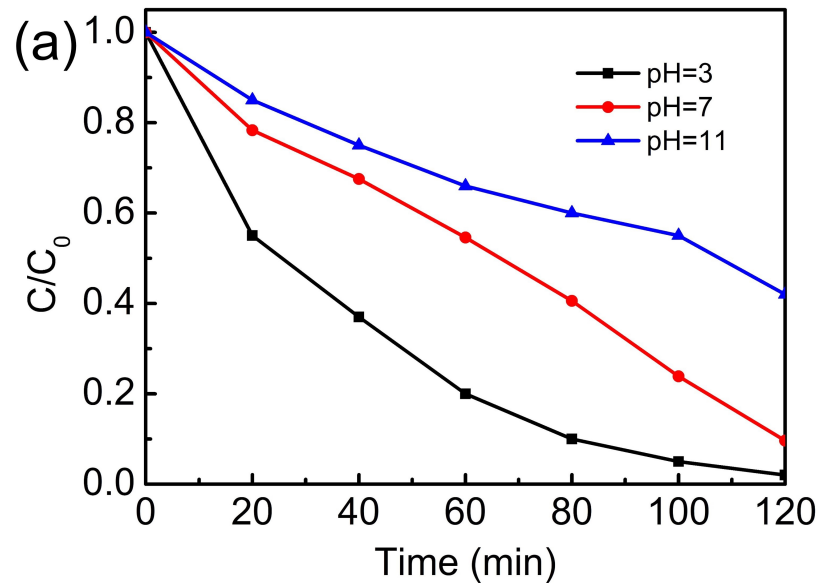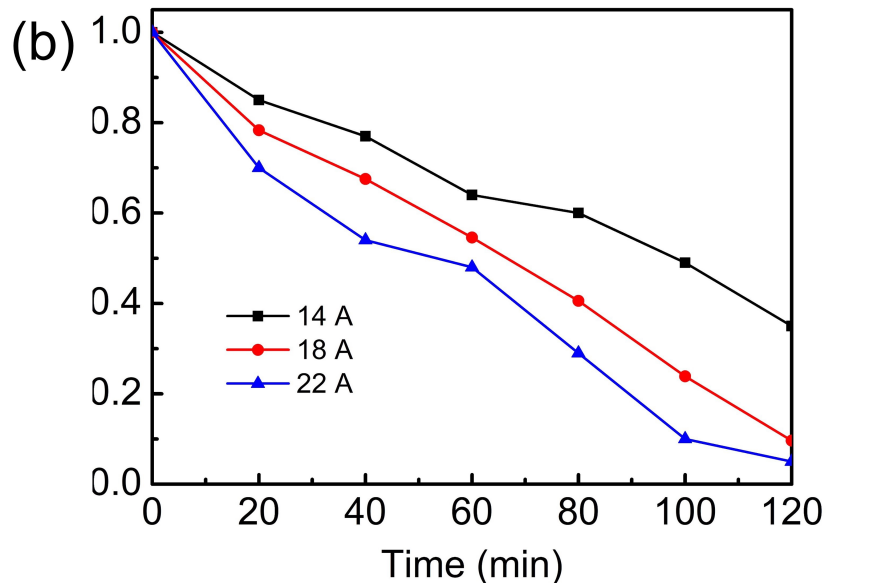

Supplement: d2cy00892k6.pdf [file d2cy00892k6.pdf]
